# Supplementary material
Source: PubMed Central journal article supplement (PMC8496096)
Supplement: 12884_2021_4131_MOESM1_ESM.pdf [file 12884_2021_4131_MOESM1_ESM.pdf]

# MIPREG QUESTIONNAIRE

## 1. GENERAL

1.1 What country were you born in?

---

1.2. What country was the father of your child born in?

---

1.3. How long have you lived in Norway?

---

1.4. How old are you?

---

1.5. What language do you use most often at home?

---

1.6. How good is your Norwegian?

|                 |        |      |                 |            |
|-----------------|--------|------|-----------------|------------|
| Oral –          | Fluent | Good | Some difficulty | Not at all |
| Reading –       | Fluent | Good | Some difficulty | Not at all |
| Writing –       | Fluent | Good | Some difficulty | Not at all |
| Comprehension – | Fluent | Good | Some difficulty | Not at all |

---

1.7. What is your postal code?

---

1.8. What is your marital status?

- Single
  - Married/cohabiting
  - Divorced
  - Widow
- 

1.9. Who do you live with?

- Partner
  - Your family (your mother/father, your brother/sister)
  - In-laws (parent in-law, your partner's brother/sister)
  - Friends/colleagues
  - Children (in addition to your newborn child)
  - None, I live alone
- 

1.10 a) Do you have anyone you trust with whom you can speak in confidence?

- Yes
  - No
- 

1.10 b) If the answer is YES, who is this person?

- Partner
  - Your family (your mother/father, your brother/sister)
  - In-laws (parent in-law, your partner's brother/sister)
  - Friends/colleagues
- 

1.11 What is the highest level of education you completed?

- I have no schooling
  - Begun, but not completed compulsory education
  - Primary/lower secondary school (first 7 to 10 years of schooling)
  - High school/upper secondary (the next 1-3 years of education)
  - Tertiary/university, short (up to 4 years)
  - Tertiary/university, long (4 years or more)
- 

1.12 Have you had paid work since coming to Norway?

- Yes
  - No
- 

1.13 In the course of the last 12 months, have you or your family had difficulties making ends meet and paying monthly expenses (food, transport, housing etc.)?

- Yes, often
- Yes, occasionally
- No, never
- Do not know/prefer not to answer

## 2. YOUR HEALTH BEFORE PREGNANCY

2.1. Did you have any illnesses or ailments before becoming pregnant?

- Yes
  - Diabetes
  - Heart/vascular disorder (including hypertension)
  - Autoimmune illness (rheumatoid illness, metabolic disorder, transplantation)
  - Systemic Lupus Erythematosus (SLE)
  - Anaemia (iron deficiency and thalassemia)
  - Kidney disease
  - Treated tuberculosis
  - HIV, hepatitis
  - Overweight
  - Neurological illness (such as epilepsy)
  - Lung illness (such as asthma)
  - Mental disorder (such as depression)
  - Other: i) \_\_\_\_\_ ii) \_\_\_\_\_
- No

---

2.2 a) How much did you weigh before pregnancy?

2.2 b) What is your height?

---

2.3 How would you assess your health for the time being. How would you describe your health?

... good / neither good nor bad / poor?

---

2.4 Describe your situation: Not troubled, A little troubled, Very troubled or Extremely troubled ...

a)... being constantly afraid or anxious?

- not troubled / a little troubled /very troubled / extremely troubled

b)... a sense of hopelessness for the future?

- not troubled / a little troubled /very troubled / extremely troubled

c)... a sense of loneliness?

- not troubled / a little troubled /very troubled / extremely troubled

---

We have some questions about how you planned this pregnancy and if you used birth control/contraception.

2.5 Was this pregnancy planned?

- Yes (go to part 3)
- No
- Do not know/unsure

---

2.5 If the pregnancy was not planned or you are not sure if it was planned, did you use any form of contraception to avoid pregnancy?

Yes

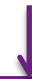

2.7 What did you use?

- Barrier methods (condom, diaphragm)
- Non-hormonal methods/natural methods (interrupted intercourse/safe periods, breast feeding)
- Hormonal contraceptives (The pill, mini-pill, pregnancy prevention patches, vaginal ring)
- LARC (hormonal and/or copper spiral/IUD, contraceptive injection)
- Other (specify) \_\_\_\_\_

No

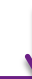

2.8 Why did you not want to use birth control?

- Too expensive
- Did not have enough information about different methods/options
- I did not know where I could get hold of these
- No access to doctor/nurse
- Side effects
- Religious reasons
- Husband/partner/family did not want it
- Other (specify) \_\_\_\_\_

### 3. OBSTETRIC CLINICAL HISTORY

3.1 How many children have you born, in total (including your new child)?

---

3.2 How many births have you had (past week 23)?

---

3.3 How many of your children were born in Norway (including your newborn)?

---

3.4 Have you had difficulties in previous pregnancies and births?

• Yes, which:

- Cesarean section
- Nausea during pregnancy
- Hemorrhages/bleeding/anaemia
- High blood pressure
- Preeclampsia
- Deep vein thrombosis (blood clot in the leg)
- Gestational diabetes
- Low-lying placenta
- Abruptio placenta
- Urinary tract infection
- Symphysiolysis
- Premature birth (<37 weeks)
- Premature birth (<34 weeks)
- Early rupture of membrane
- Intrauterine growth retardation (decreasing growth indicated by series measurements)
- Foetal death
- Congenital abnormalities in foetus
- Sphincter rupture (grade 3+4)
- Postpartum depression
- Other (please specify): \_\_\_\_\_
  - No, first birth
  - No, I have not had any complications

### 4. CURRENT PREGNANCY

4.1 Were you pregnant with your newborn child when you came to Norway?

- Yes
  - No
  - Do not remember/do not know
- 

4.2 Did you receive any form of health care for the pregnancy before birth from a health care provider (doctor, nurse, midwife) in Norway?

- Yes
  - No
- 

4.3 Who provided health care for your pregnancy in Norway?

- GP/Family doctor
  - Specialist (obstetrician) at the hospital
  - The midwife at the health clinic
  - Other \_\_\_\_\_
- 

4.4 How many weeks pregnant were you when you first received health care for this pregnancy in Norway?

---

4.5 Did you experience any difficulties in this pregnancy?

- Yes, which
  - Cesarean section
  - Nausea during pregnancy
  - Anaemia
  - High blood pressure
  - Preeclampsia
  - Deep vein thrombosis (blood clot in the leg)
  - Gestational diabetes
  - Low-lying placenta
  - Abruptio placenta
  - Urinary tract infection

- Symphysiolysis
- Premature birth (<37 weeks)
- Premature birth (<34 weeks)
- Early rupture of membrane
- Intrauterine growth retardation (decreasing growth indicated by series measurements)
- Foetal death
- Congenital abnormalities in foetus
- Postpartum depression
- Other (please specify): \_\_\_\_\_
- No, I had no complications

4.6. Which of the following offers did you accept during pregnancy?

- Municipal help (pregnancy course, prepare for birthing course, parental guidance)
- Other offers from non-governmental organizations (Bydelismødre etc.)
- Contact with health care providers in your home country
- Alternative medicine/rituals
- Child Welfare Services
- Ultrasound foster diagnostics at the hospital (for special patient groups)
- Routine ultrasound, Week 18
- Other (please specify) \_\_\_\_\_

4.7. Of the offers mentioned above, are there any you would have liked to use but felt they were not available during your pregnancy?

- Yes, specify (from the options above) \_\_\_\_\_
- No

4.8. Have the following factors prevented you from taking advantage of an offer from the public health service?

- Practical limitations (transportation, work, lack of time) Yes – No
- Language barriers Yes – No
- Lack of information about offers (not aware they existed, did not know how Norway's health care system works, did not think I was entitled) Yes – No

- Afraid that it could affect my visa/residency application process Yes – No
- Afraid of medical examinations and tests Yes – No
- Other (please specify): \_\_\_\_\_

4.9. What were your 2 main sources of information about pregnancy and birth during this pregnancy?

- Previous pregnancies/births
- Family/friends
- Religious/spiritual leader
- Health care providers
- Offers from my neighbourhood/district (courses)
- Mass media (books, TV, internet)
- Other (please specify): \_\_\_\_\_

4.10. Did you get enough information about the following topics in the course of this pregnancy/birth?

- Physical changes during pregnancy Yes – No
- Emotional changes (feelings) during pregnancy Yes – No
- Recommended medical tests (HIV, hepatitis) Yes – No
- Nutrition during pregnancy Yes – No
- Signs that the birth had started Yes – No
- The various phases of birth Yes – No
- Pain relief during childbirth Yes – No
- Changes in mood after the birth Yes – No
- Breastfeeding Yes – No
- Infant formula Yes – No
- Where and who you could contact if you needed advice or had questions about your health or your newborn child's health Yes – No
- Family planning and birth control Yes – No

4.11. Did you take daily vitamin supplements during pregnancy?

- Yes (skip to question 4.12)
- No (go to next question)

4.12. If NO, why not?

- Did not know why it should be taken
- Could not find it at the store
- Too expensive
- Did not need it
- Was not told/asked about taking it
- Other (please specify): \_\_\_\_\_

---

4.13. Which of the following statements best describes your habits during pregnancy?

- Smoking: I did not smoke, I smoked occasionally, I smoked daily
- Snuff: I did not take snuff, I took snuff occasionally, I took snuff daily
- Alcohol: I did not drink alcohol, I drank alcohol occasionally, I drank alcohol every day

## 5. BIRTH

5.1. How many weeks were you pregnant before giving birth?

---

5.2. How many baby(is) were born?

---

5.3. Were any of the following procedures performed during the birth?

- Labour induction
- Use of a vacuum
- Use of forceps
- Cesarean section
- Episiotomy (cutting near the opening of the vagina)
- Epidural/Spinal anaesthesia as pain relief
- Pudendal blockade as pain relief
- Other (please specify): \_\_\_\_\_

---

5.4. Did you have any complications during the birth?

- Yes

- Sphincter rupture (grade 3-4)
- Bleeding that needed transfusion
- The infant was moved to the neonatal ward
- Use of antibiotics
- Other (please specify): \_\_\_\_\_

- No

---

5.5. If your child was born via caesarean section, what was the reason for it?

- It was scheduled because the doctor recommended it for medical reasons
- It was planned, but you do not know why
- It was scheduled because you wanted it, but not for medical reasons
- It was not planned, but the birth took a long time
- It was not planned but the baby/foetus was in danger
- It was not planned but you were in danger
- It was not planned and you do not know why it was done
- Other (please specify): \_\_\_\_\_

---

5.6. Are you satisfied with the help you received from the health care provider to relieve your pain?

- Yes
- No
- Not a vaginal birth, I had a caesarean section

---

5.7. Were you allowed to have a family member or other support person (including a doula) with you in the birthing room?

- Yes
- No

---

5.8. Do you feel that the duration of your hospitalisation after birth was:

- Too short
- OK/suitable
- Too long

6. OVERALL EXPERIENCE OF PREGNANCY CARE RECEIVED

6.1. Did the health care provider refuse any care, special practice or ritual during or after birth that you requested?

- Yes
- No (go to question 6.4)

6.2. If yes, what were these wishes?

- i) \_\_\_\_\_ ii) \_\_\_\_\_

6.3. If YES, what reason did the health care provider give for not allowing your wishes?

- i) \_\_\_\_\_ ii) \_\_\_\_\_

6.4. Is there anything you think the health care provider could have done differently or better during the pregnancy, birth or after birth?

- Yes, please specify what could have been done differently or better

and by whom \_\_\_\_\_

- No

6.5. Overall, were you satisfied with the health care you got? Did you feel welcome, was the health care provider helpful and respectful?

- a) During pregnancy – Always – Sometimes – Rarely – Never
- b) During the birth – Always – Sometimes – Rarely – Never
- c) After birth – Always – Sometimes – Rarely – Never

6.6. Did you understand the information the health care provider tried to convey to you?

- a) During pregnancy – Always – Sometimes – Rarely – Never
- b) During the birth – Always – Sometimes – Rarely – Never
- c) After birth – Always – Sometimes – Rarely – Never

6.7. Do you think you would have understood the information that was conveyed to you better in another language, such as your native language?

- Yes
- No

6.8. Were you offered an interpreter?

- a) During pregnancy – yes/no/did not need an interpreter
- b) During the birth – yes/no/did not need an interpreter
- c) After birth – yes/no/did not need an interpreter

6.9. If you had someone there to interpret for you, who was it?

- Partner/other adult family member/friend
- Child (<18 years)
- Health care provider
- Professional interpreter
- Other \_\_\_\_\_

6.10. Were you happy with their interpretation?

- Yes
- No

6.11. The health care provider asked me if I had any questions.

Always – Sometimes – Rarely – Never

6.12. I felt that my concerns were taken seriously by the health care providers

Always – Sometimes – Rarely – Never

6.13. I had to wait a long time before I got help.

- a) During pregnancy – Always – Sometimes – Rarely – Never
- b) During the birth – Always – Sometimes – Rarely – Never
- c) After birth – Always – Sometimes – Rarely – Never

- 6.14. The health care providers made decisions without asking my opinion
- a) During pregnancy – Always – Sometimes – Rarely – Never
  - b) During the birth – Always – Sometimes – Rarely – Never
  - c) After birth – Always – Sometimes – Rarely – Never
- 

- 6.15. The health care provider spent enough time explaining things to me.
- a) During pregnancy – Always – Sometimes – Rarely – Never
  - b) During the birth – Always – Sometimes – Rarely – Never
  - c) After birth – Always – Sometimes – Rarely – Never
- 

- 6.16. Overall, do you feel that you were treated differently by the health care providers, compared with other people? (i.e. because of language, culture, religion)?
- Always – Sometimes – Rarely – Never
- 

6.17. If yes, why do you think you were treated differently?

- Language
- Culture
- Ethnic background
- Skin colour
- Religion
- Migration status/immigrant background
- Other reasons (please specify): \_\_\_\_\_

## 7. MIGRATION

7.1. What was the legal basis for your residency permit in Norway? Is it ...

- Work/partner's work
- Reunion with family

- Marriage
  - Refuge (resettlement refugee, quota refugee, humanitarian grounds, asylum)
  - Education
  - Undocumented
  - Other (please specify): \_\_\_\_\_
- 

7.2. Did you live at a reception centre for asylum-seekers while you were pregnant with this child?

- Yes
  - No
- 

7.3. If yes, how long did you live there?

---

7.4. Do you have a work permit in Norway?

- Yes
  - No
- 

7.5 How satisfied or dissatisfied are you with your life after coming to Norway?

- Dissatisfied
  - Neither satisfied or dissatisfied
  - Satisfied
- 

7.6 How satisfied or dissatisfied were you with life in your home country before you came to Norway?

- Dissatisfied
- Neither satisfied or dissatisfied
- Satisfied
